# Supplementary material for: Functional characterisation of the osteoarthritis susceptibility locus at chromosome 6q14.1 marked by the polymorphism rs9350591
Source: Springer Nature journal article supplement (doi:10.1186/s12881-015-0215-9), 2015-09-07
Supplement: MOESM1 [file 9741360]

**Additional file 1.** Primer and probe sequences used for real-time reverse transcription PCR (qPCR). The PrimeTime® qPCR Assays were purchased from Integrated DNA Technologies (IDT), who perform quality control by mass spectrometry, with all QC results provided on their website.

| <b>Gene</b>    | <b>Probe sequence (5'-3')</b>                    | <b>Primer 1 (5'-3')</b>       | <b>Primer 2 (5'-3')</b>    |
|----------------|--------------------------------------------------|-------------------------------|----------------------------|
| <i>COL12A1</i> | 56-FAM/TCCCCTGTG/ZEN/GAAGGCTGATAAGTGA/3IABkFQ    | CGGTGATAGTGTAAGGAGTGTC        | TGGTCGTGTGCAGAAATATAGG     |
| <i>TMEM30A</i> | 56-FAM/TGTGACATT/ZEN/CAAAGAGTATCGGCCAGC/3IABkFQ  | CAGCATTACCTACTTTTCGCAAG       | TCATCCGTTTTTCGTCCATCAA     |
| <i>MYO6</i>    | 56-FAM/TGGCGTCCT/ZEN/GCACCTTGGAATA/3IABkFQ       | CCAAACCCAGTAATTCAGCAC         | AAAGCTTGATCTCTTCCGGG       |
| <i>SENP6</i>   | 56-FAM/CTGTAAGGT/ZEN/TAAGTCGGCTCCAAGGT/3IABkFQ   | TCCTCTTAATTTTCAGGCTCCAC       | AAAGAATACCCACCTCATGTCC     |
| <i>FILIP1</i>  | 56-FAM/ACAACGTCA/ZEN/TCTGCTCGAGGAACC/3IABkFQ     | AGCACTATCACCATAACACCG         | CTTTTGACATAGGAATGCGGG      |
| <i>COX7A2</i>  | 56-FAM/AGATTGGGC/ZEN/AGAGGACGATAAGCAC/3IABkFQ    | TGGTCAGTAACAGCCAAGATG         | TTTTAAAATGCCTGCGGGAAG      |
| <i>GAPDH</i>   | 56-FAM/AAGGTCGGAGTCAACGGATTTGGTC/IABkFQ/36-TAMSp | TGTAGTTGAGGTCAATGAAGGG        | ACATCGCTCAGACACCATG        |
| <i>HPRT1</i>   | 56-FAM/AGGACTGAACGTCTTGCTCGAGATG/36-TAMSp        | ACAGAGGGCTACAATGTGATG         | TGCTGAGGATTTGAAAAGGG       |
| <i>18S</i>     | 56-FAM/TCCTTTGGTCGCTCGCTCCTCTCCC/TAMRA           | TATTAGCTCTAGAATTACCACAGTTATCC | CGAATGGCTCATTAAATCAGTTATGG |
