# Supplementary material for: Functional characterisation of the osteoarthritis susceptibility locus at chromosome 6q14.1 marked by the polymorphism rs9350591
Source: Springer Nature journal article supplement (doi:10.1186/s12881-015-0215-9), 2015-09-07
Supplement: MOESM2 [file 9741360]

| Patient | Sex | Age at surgery (years) | Joint replaced at surgery | Genotype at rs9350591 | Used in discovery qPCR? |         |      |       |        |        | Used in replication qPCR? |         |      |       |        |        | Used in allelic expression imbalance? |         |      |       |
|---------|-----|------------------------|---------------------------|-----------------------|-------------------------|---------|------|-------|--------|--------|---------------------------|---------|------|-------|--------|--------|---------------------------------------|---------|------|-------|
|         |     |                        |                           |                       | COL12A1                 | TMEM30A | MYO6 | SENP6 | FILIP1 | COX7A2 | COL12A1                   | TMEM30A | MYO6 | SENP6 | FILIP1 | COX7A2 | COL12A1                               | TMEM30A | MYO6 | SENP6 |
| 49      | M   | 71                     | K                         | CT                    | Yes                     | Yes     | Yes  | Yes   | Yes    | Yes    |                           |         |      |       |        |        |                                       |         |      |       |
| 50      | F   | 67                     | K                         | CC                    |                         |         |      |       |        |        |                           |         |      |       |        |        |                                       | Yes     |      |       |
| 51      | F   | 58                     | K                         | CC                    | Yes                     | Yes     | Yes  | Yes   | Yes    | Yes    |                           |         |      |       |        |        |                                       |         |      |       |
| 52      | M   | 59                     | K                         | CT                    | Yes                     | Yes     | Yes  | Yes   | Yes    | Yes    |                           |         |      |       |        |        |                                       |         |      |       |
| 53      | F   | 81                     | K                         | CT                    | Yes                     | Yes     | Yes  | Yes   | Yes    | Yes    |                           |         |      |       |        |        |                                       | Yes     | Yes  | Yes   |
| 54      | F   | 80                     | K                         | CC                    | Yes                     | Yes     | Yes  | Yes   |        | Yes    |                           |         |      |       |        |        |                                       | Yes     |      |       |
| 55      | F   | 64                     | K                         | CC                    |                         |         |      |       |        |        |                           |         |      |       |        |        |                                       | Yes     |      |       |
| 56      | F   | 62                     | K                         | CC                    | Yes                     | Yes     | Yes  | Yes   | Yes    | Yes    |                           |         |      |       |        |        |                                       |         |      |       |
| 57      | F   | 80                     | K                         | CT                    | Yes                     | Yes     | Yes  | Yes   | Yes    | Yes    |                           |         |      |       |        |        |                                       | Yes     |      |       |
| 58      | F   | 59                     | K                         | CC                    | Yes                     | Yes     | Yes  | Yes   | Yes    | Yes    |                           |         |      |       |        |        |                                       | Yes     |      |       |
| 59      | F   | 71                     | H                         | CT                    |                         |         |      |       |        |        | Yes                       | Yes     | Yes  | Yes   | Yes    | Yes    |                                       |         |      |       |
| 60      | M   | 74                     | K                         | CC                    | Yes                     | Yes     | Yes  | Yes   | Yes    | Yes    |                           |         |      |       |        |        |                                       |         |      |       |
| 61      | M   | 72                     | K                         | CC                    | Yes                     | Yes     | Yes  | Yes   | Yes    | Yes    |                           |         |      |       |        |        |                                       |         |      |       |
| 62      | M   | 72                     | K                         | CC                    | Yes                     | Yes     | Yes  | Yes   | Yes    | Yes    |                           |         |      |       |        |        |                                       |         |      |       |
| 63      | M   | 68                     | H                         | CC                    | Yes                     | Yes     | Yes  | Yes   | Yes    | Yes    |                           |         |      |       |        |        |                                       |         |      |       |
| 64      | F   | 63                     | H                         | CC                    | Yes                     | Yes     | Yes  | Yes   | Yes    | Yes    |                           |         |      |       |        |        |                                       |         |      |       |
| 65      | M   | 77                     | K                         | CC                    | Yes                     | Yes     | Yes  | Yes   | Yes    | Yes    |                           |         |      |       |        |        |                                       |         |      |       |
| 66      | M   | 71                     | H                         | CC                    | Yes                     | Yes     | Yes  | Yes   | Yes    | Yes    |                           |         |      |       |        |        |                                       |         |      |       |
| 67      | M   | 71                     | H                         | CT                    | Yes                     | Yes     | Yes  | Yes   | Yes    | Yes    |                           |         |      |       |        |        |                                       |         |      |       |
| 68      | F   | 73                     | K                         | CC                    | Yes                     | Yes     | Yes  | Yes   | Yes    | Yes    |                           |         |      |       |        |        |                                       |         |      |       |
| 69      | F   | 82                     | K                         | CT                    | Yes                     | Yes     | Yes  | Yes   | Yes    | Yes    |                           |         |      |       |        |        |                                       |         |      |       |
| 70      | M   | 71                     | K                         | CC                    | Yes                     | Yes     | Yes  | Yes   | Yes    | Yes    |                           |         |      |       |        |        |                                       |         |      |       |
| 71      | M   | 80                     | K                         | CC                    | Yes                     | Yes     | Yes  | Yes   | Yes    | Yes    |                           |         |      |       |        |        |                                       |         | Yes  |       |
| 72      | M   | 66                     | H                         | CC                    | Yes                     | Yes     | Yes  | Yes   | Yes    | Yes    | Yes                       |         |      |       | Yes    |        |                                       |         |      |       |
| 73      | M   | 69                     | K                         | CC                    | Yes                     | Yes     | Yes  | Yes   |        | Yes    |                           |         |      |       |        |        |                                       |         |      |       |
| 74      | F   | 58                     | K                         | CC                    | Yes                     | Yes     | Yes  | Yes   |        | Yes    |                           |         |      |       |        |        |                                       |         |      |       |
| 75      | F   | 60                     | K                         | CC                    | Yes                     | Yes     | Yes  | Yes   | Yes    | Yes    |                           |         |      |       |        |        |                                       |         |      |       |
| 76      | F   | 62                     | K                         | CC                    | Yes                     | Yes     | Yes  | Yes   | Yes    | Yes    |                           |         |      |       |        |        |                                       |         |      |       |
| 77      | F   | 67                     | H                         | CT                    | Yes                     | Yes     | Yes  | Yes   | Yes    | Yes    |                           |         |      |       |        |        |                                       |         |      |       |
| 78      | M   | 53                     | K                         | CC                    |                         |         |      |       |        |        |                           |         |      |       |        |        |                                       | Yes     |      |       |
| 79      | M   | 65                     | K                         | CC                    |                         |         |      |       |        |        |                           |         |      |       |        |        |                                       |         | Yes  |       |
| 80      | M   | 85                     | H                         | CC                    |                         |         |      |       |        |        |                           |         |      |       |        |        |                                       | Yes     | Yes  | Yes   |
| 81      | F   | 71                     | K                         | CC                    |                         |         |      |       |        |        |                           |         |      |       |        |        | Yes                                   |         |      |       |
| 82      | M   | 49                     | K                         | CT                    |                         |         |      |       |        |        |                           |         |      |       |        |        |                                       |         |      | Yes   |
| 83      | F   | 62                     | H                         | CC                    |                         |         |      |       |        |        |                           |         |      |       |        |        | Yes                                   |         |      |       |
| 84      | M   | 67                     | K                         | CC                    |                         |         |      |       |        |        |                           |         |      |       |        |        | Yes                                   |         |      |       |
| 85      | F   | 64                     | K                         | CC                    |                         |         |      |       |        |        |                           |         |      |       |        |        | Yes                                   |         |      | Yes   |
| 86      | M   | 59                     | H                         | CC                    |                         |         |      |       |        |        |                           | Yes     |      | Yes   |        |        |                                       |         |      |       |
| 87      | M   | 65                     | K                         | CC                    |                         |         |      |       |        |        |                           |         |      |       |        |        | Yes                                   |         |      |       |
| 88      | F   | 72                     | K                         | CT                    |                         |         |      |       |        |        |                           |         |      |       |        |        |                                       |         |      | Yes   |
| 89      | F   | 54                     | K                         | CT                    |                         |         |      |       |        |        |                           |         |      |       |        |        |                                       |         |      | Yes   |
| 90      | F   | 72                     | K                         | CT                    |                         |         |      |       |        |        |                           |         |      |       |        |        | Yes                                   |         | Yes  | Yes   |
| 91      | F   | 76                     | H                         | CC                    |                         |         |      |       |        |        |                           |         |      |       |        |        | Yes                                   |         | Yes  | Yes   |
| 92      | F   | 71                     | K                         | CC                    |                         |         |      |       |        |        |                           |         |      |       |        |        | Yes                                   |         |      | Yes   |
| 93      | M   | 48                     | H                         | CT                    |                         |         |      |       |        |        |                           |         |      |       |        |        |                                       | Yes     |      | Yes   |
| 94      | F   | 59                     | H                         | CC                    |                         |         |      |       |        |        | Yes                       | Yes     | Yes  | Yes   | Yes    | Yes    | Yes                                   | Yes     | Yes  | Yes   |
| 95      | M   | 90                     | H                         | CC                    |                         |         |      |       |        |        | Yes                       | Yes     | Yes  | Yes   | Yes    | Yes    |                                       |         |      |       |
| 96      | F   | 52                     | H                         | CT                    |                         |         |      |       |        |        |                           |         |      |       |        |        |                                       |         | Yes  |       |
| 97      | F   | 73                     | K                         | CC                    |                         |         |      |       |        |        |                           |         |      |       |        |        |                                       | Yes     |      |       |
| 98      | F   | 64                     | K                         | CC                    |                         |         |      |       |        |        |                           |         |      |       |        |        |                                       | Yes     | Yes  | Yes   |



| Patient | Sex | Age at surgery (years) | Joint replaced at surgery | Genotype at rs9350591 | Used in discovery qPCR? |         |      |       |        |        | Used in replication qPCR? |         |      |       |        |        | Used in allelic expression imbalance? |         |      |       |
|---------|-----|------------------------|---------------------------|-----------------------|-------------------------|---------|------|-------|--------|--------|---------------------------|---------|------|-------|--------|--------|---------------------------------------|---------|------|-------|
|         |     |                        |                           |                       | COL12A1                 | TMEM30A | MYO6 | SENP6 | FILIP1 | COX7A2 | COL12A1                   | TMEM30A | MYO6 | SENP6 | FILIP1 | COX7A2 | COL12A1                               | TMEM30A | MYO6 | SENP6 |
| 149     | 77  | F                      | H                         | CC                    |                         |         |      |       |        |        | Yes                       | Yes     | Yes  | Yes   | Yes    | Yes    |                                       |         |      |       |
| 150     | 62  | F                      | H                         | CC                    |                         |         |      |       |        |        | Yes                       | Yes     | Yes  | Yes   |        | Yes    |                                       |         |      |       |
| 151     | 79  | F                      | H                         | CT                    |                         |         |      |       |        |        | Yes                       | Yes     | Yes  | Yes   | Yes    | Yes    |                                       |         |      |       |
| 152     | 73  | M                      | H                         | CC                    |                         |         |      |       |        |        | Yes                       | Yes     | Yes  | Yes   |        | Yes    |                                       |         |      |       |
| 153     | 51  | F                      | H                         | CC                    |                         |         |      |       |        |        |                           |         |      |       |        |        | Yes                                   |         |      |       |
| 154     | 51  | F                      | H                         | CC                    |                         |         |      |       |        |        | Yes                       | Yes     | Yes  | Yes   | Yes    | Yes    |                                       |         |      |       |
| 155     | 64  | M                      | H                         | CC                    |                         |         |      |       |        |        |                           | Yes     |      |       |        | Yes    |                                       |         |      |       |
| 156     | 58  | F                      | H                         | CC                    |                         |         |      |       |        |        | Yes                       | Yes     | Yes  | Yes   |        | Yes    |                                       |         |      |       |
| 157     | 58  | F                      | H                         | CC                    |                         |         |      |       |        |        | Yes                       | Yes     | Yes  | Yes   |        | Yes    |                                       |         |      |       |
| 158     | 80  | F                      | H                         | CC                    |                         |         |      |       |        |        | Yes                       | Yes     | Yes  | Yes   |        | Yes    |                                       |         |      |       |
| 159     | 84  | M                      | H                         | CC                    |                         |         |      |       |        |        |                           | Yes     |      |       |        | Yes    |                                       |         |      |       |
| 160     | M   | 68                     | K                         | CT                    | Yes                     | Yes     | Yes  | Yes   | Yes    | Yes    |                           |         |      |       |        |        |                                       |         |      |       |
| 161     | M   | 75                     | K                         | CT                    | Yes                     | Yes     | Yes  | Yes   | Yes    | Yes    |                           |         |      |       |        |        |                                       |         |      |       |
| 162     | F   | 69                     | H                         | CT                    | Yes                     | Yes     | Yes  | Yes   | Yes    | Yes    |                           |         |      |       |        |        |                                       |         |      |       |
| 163     | F   | 71                     | H                         | CC                    | Yes                     | Yes     | Yes  | Yes   | Yes    | Yes    |                           |         |      |       |        |        |                                       |         |      |       |
| 164     | F   | 81                     | H                         | CC                    | Yes                     | Yes     | Yes  | Yes   | Yes    | Yes    |                           |         |      |       |        |        |                                       |         |      |       |
| 165     | F   | 72                     | H                         | CC                    | Yes                     | Yes     | Yes  | Yes   | Yes    | Yes    |                           |         |      |       |        |        |                                       |         |      |       |
| 166     | F   | 84                     | H                         | CT                    | Yes                     | Yes     | Yes  | Yes   | Yes    | Yes    |                           |         |      |       |        |        |                                       |         |      |       |
| 167     | F   | 79                     | H                         | CC                    | Yes                     | Yes     | Yes  | Yes   | Yes    | Yes    |                           |         |      |       |        |        |                                       |         |      |       |
| 168     | F   | 94                     | H                         | CC                    | Yes                     | Yes     | Yes  | Yes   | Yes    | Yes    |                           |         |      |       |        |        |                                       |         |      |       |
| 169     | F   | 84                     | H                         | CC                    | Yes                     | Yes     | Yes  | Yes   | Yes    | Yes    |                           |         |      |       |        |        |                                       |         |      |       |
| 170     | F   | 84                     | H                         | CC                    | Yes                     | Yes     | Yes  | Yes   | Yes    | Yes    |                           |         |      |       |        |        |                                       |         |      |       |
| 171     | F   | 68                     | H                         | CC                    | Yes                     | Yes     | Yes  | Yes   | Yes    | Yes    |                           |         |      |       |        |        |                                       |         |      |       |
| 172     | F   | 80                     | H                         | CC                    | Yes                     | Yes     | Yes  | Yes   | Yes    | Yes    |                           |         |      |       |        |        |                                       |         |      |       |
| 173     | F   | 86                     | H                         | CC                    | Yes                     | Yes     | Yes  | Yes   | Yes    | Yes    |                           |         |      |       |        |        |                                       |         |      |       |
| 174     | F   | 89                     | H                         | CC                    | Yes                     | Yes     | Yes  | Yes   | Yes    | Yes    |                           |         |      |       |        |        |                                       |         |      |       |
| 175     | F   | 91                     | H                         | CC                    | Yes                     | Yes     | Yes  | Yes   | Yes    | Yes    |                           |         |      |       |        |        |                                       |         |      |       |
| 176     | F   | 82                     | H                         | CT                    | Yes                     | Yes     | Yes  | Yes   | Yes    | Yes    |                           |         |      |       |        |        |                                       |         |      |       |
| 177     | F   | 80                     | H                         | CC                    | Yes                     | Yes     | Yes  | Yes   | Yes    | Yes    |                           |         |      |       |        |        |                                       |         |      |       |
| 178     | F   | 83                     | H                         | CC                    | Yes                     | Yes     | Yes  | Yes   | Yes    | Yes    |                           |         |      |       |        |        |                                       |         |      |       |
| 179     | F   | 84                     | H                         | CC                    | Yes                     | Yes     | Yes  | Yes   | Yes    | Yes    |                           |         |      |       |        |        |                                       |         |      |       |
| 180     | F   | 82                     | H                         | CC                    | Yes                     | Yes     | Yes  | Yes   | Yes    | Yes    |                           |         |      |       |        |        |                                       |         |      |       |
| 181     | M   | 85                     | H                         | CC                    |                         |         |      |       |        |        |                           |         |      |       |        |        | Yes                                   |         |      | Yes   |
| 182     | F   | 80                     | H                         | CC                    |                         |         |      |       |        |        |                           |         |      |       |        |        |                                       |         |      | Yes   |
| 183     | F   | 95                     | H                         | CC                    |                         |         |      |       |        |        |                           |         |      |       |        |        |                                       |         |      | Yes   |
| 184     | M   | 75                     | H                         | CC                    |                         |         |      |       |        |        |                           |         |      |       |        | Yes    |                                       | Yes     |      | Yes   |
| 185     | M   | 79                     | H                         | CC                    |                         |         |      |       |        |        |                           |         |      |       |        |        |                                       |         |      | Yes   |
| 186     | F   | 81                     | H                         | CT                    |                         |         |      |       |        |        |                           |         |      |       |        | Yes    | Yes                                   |         |      | Yes   |
| 187     | F   | 77                     | H                         | CC                    |                         |         |      |       |        |        |                           |         |      |       |        |        |                                       |         |      | Yes   |
| 188     | M   | 86                     | H                         | CC                    |                         |         |      |       |        |        |                           |         |      |       |        | Yes    |                                       | Yes     |      | Yes   |
| 189     | F   | 62                     | H                         | CC                    |                         |         |      |       |        |        |                           |         |      |       |        |        | Yes                                   |         | Yes  | Yes   |
| 190     | F   | 92                     | H                         | CC                    |                         |         |      |       |        |        |                           |         |      |       |        | Yes    |                                       |         |      | Yes   |
