# Supplementary material for: Functional characterisation of the osteoarthritis susceptibility locus at chromosome 6q14.1 marked by the polymorphism rs9350591
Source: Springer Nature journal article supplement (doi:10.1186/s12881-015-0215-9), 2015-09-07
Supplement: MOESM3 [file 9741360]

**Additional file 3.** *n* numbers used for real-time reverse transcription PCR (qPCR) and allelic expression imbalance (AEI)

|              |                  | <b>Discovery qPCR (<i>n</i> numbers)</b> |                       |                    |                     |                      |                      |
|--------------|------------------|------------------------------------------|-----------------------|--------------------|---------------------|----------------------|----------------------|
|              | <b>rs9350591</b> |                                          |                       |                    |                     |                      |                      |
| <b>Joint</b> | <b>genotype</b>  | <b><i>COL12A1</i></b>                    | <b><i>TMEM30A</i></b> | <b><i>MYO6</i></b> | <b><i>SENP6</i></b> | <b><i>FILIP1</i></b> | <b><i>COX7A2</i></b> |
| OA hip       | CC               | 14                                       | 14                    | 14                 | 14                  | 12                   | 14                   |
|              | T carriers       | 7                                        | 7                     | 7                  | 7                   | 7                    | 7                    |
| OA knee      | CC               | 36                                       | 36                    | 36                 | 36                  | 33                   | 36                   |
|              | T carriers       | 17                                       | 17                    | 17                 | 17                  | 16                   | 17                   |
| NOF          | CC               | 16                                       | 16                    | 16                 | 16                  | 12                   | 16                   |
|              | T carriers       | 3                                        | 3                     | 3                  | 3                   | 2                    | 3                    |

|              |                  | <b>Replication qPCR (<i>n</i> numbers)</b> |                       |                    |                     |                      |                      |
|--------------|------------------|--------------------------------------------|-----------------------|--------------------|---------------------|----------------------|----------------------|
|              | <b>rs9350591</b> |                                            |                       |                    |                     |                      |                      |
| <b>Joint</b> | <b>genotype</b>  | <b><i>COL12A1</i></b>                      | <b><i>TMEM30A</i></b> | <b><i>MYO6</i></b> | <b><i>SENP6</i></b> | <b><i>FILIP1</i></b> | <b><i>COX7A2</i></b> |
| OA hip       | CC               | 15                                         | 18                    | 13                 | 16                  | 7                    | 19                   |
|              | T carriers       | 6                                          | 6                     | 6                  | 6                   | 4                    | 6                    |

|              |                  | <b>AEI (<i>n</i> numbers)</b> |                       |                    |                     |
|--------------|------------------|-------------------------------|-----------------------|--------------------|---------------------|
|              | <b>rs9350591</b> |                               |                       |                    |                     |
| <b>Joint</b> | <b>genotype</b>  | <b><i>COL12A1</i></b>         | <b><i>TMEM30A</i></b> | <b><i>MYO6</i></b> | <b><i>SENP6</i></b> |
| OA hip       | CC               | 9                             | 3                     | 6                  | 11                  |
|              | T carriers       | 2                             | 4                     | 4                  | 1                   |
| OA knee      | CC               | 32                            | 3                     | 16                 | 9                   |
|              | T carriers       | 4                             | 6                     | 9                  | 11                  |
| NOF          | CC               | 4                             | 1                     | 4                  | 11                  |
|              | T carriers       | 1                             | 1                     | 0                  | 0                   |
