# Supplementary material for: Functional characterisation of the osteoarthritis susceptibility locus at chromosome 6q14.1 marked by the polymorphism rs9350591
Source: Springer Nature journal article supplement (doi:10.1186/s12881-015-0215-9), 2015-09-07
Supplement: MOESM4 [file 9741360]

**Additional file 4.** The seven transcript SNPs and their pair-wise  $D'$  and  $r^2$  values relative to rs9350591

| Gene           | Transcript SNP | SNP location | Alleles (major/minor) | MAF   | Pairwise linkage disequilibrium relative to rs9350591 |       |
|----------------|----------------|--------------|-----------------------|-------|-------------------------------------------------------|-------|
|                |                |              |                       |       | $r^2$                                                 | $D'$  |
| <i>COL12A1</i> | rs594012       | Exon         | T/A                   | 0.092 | 0.018                                                 | 1.000 |
| <i>COL12A1</i> | rs240736       | Exon         | A/G                   | 0.275 | 0.000                                                 | 0.020 |
| <i>TMEM30A</i> | rs41269315     | 3' UTR       | G/A                   | 0.067 | 0.110                                                 | 0.522 |
| <i>MYO6</i>    | rs1045758      | 3' UTR       | A/G                   | 0.175 | 0.426                                                 | 0.715 |
| <i>MYO6</i>    | rs699186       | 3' UTR       | C/T                   | 0.357 | 0.079                                                 | 1.000 |
| <i>SENP6</i>   | rs71561434     | 5' UTR       | C/T                   | 0.133 | 0.746                                                 | 0.925 |
| <i>SENP6</i>   | rs17414687     | Exon         | A/G                   | 0.342 | 0.085                                                 | 1.000 |
