# Supplementary material for: Functional characterisation of the osteoarthritis susceptibility locus at chromosome 6q14.1 marked by the polymorphism rs9350591
Source: Springer Nature journal article supplement (doi:10.1186/s12881-015-0215-9), 2015-09-07
Supplement: MOESM5 [file 9741360]

**Additional file 5.** Primer sequences used for genotyping and allelic expression imbalance by pyrosequencing (top table), and primer sequences and restriction enzyme used for genotyping by restriction fragment length polymorphism analysis (bottom table)

| SNP        | Forward primer (5' - 3')      | Reverse primer (5' - 3')     | Sequencing primer (5' - 3') |
|------------|-------------------------------|------------------------------|-----------------------------|
| rs594012   | ACGCGATATTGCAGCACA            | [Btm]ACACCTAACAGCCTCGATGTTT  | CAGCACAGGTCCTGG             |
| rs240736   | [Btm]CTTGTGTTGTTAAGATAGGCA    | TGAACCCCAACACCATCTAT         | AGTCAGAAAGTGATGACCTG        |
| rs41269315 | [Btm]CAGGAGAGGTAGCAGGCTGAAC   | ACTAGTGAGGAGGAGCAGCTGAG      | GAGAGATAGGGTCAGTGAA         |
| rs1045758  | CCGCTGTAATTCCAAAACTC          | [Btm]ACTGCAAAGGAGGAAAAAATAGA | CACTAATGTTTTGGTCTGAA        |
| rs699186   | [Btm]GGCATATTCTGATGTTTCTCATCC | AGTGCCTTGATCATTTTAAGTGGT     | GTAAGTGTGCCATCCTTAA         |
| rs71561434 | CAAAGGCCTCCGCTGATG            | [Btm]GCCCCTAGCTCGTTCTGCA     | CACGCCTGGGCGGGGT            |
| rs17414687 | [Btm]CACCATCCACTGGAAAAGTAGAA  | TTCTGGAATGCTTCGTAGTTCA       | TCTGCAAGTATTTTCATTTA        |

| SNP       | Forward primer (5' - 3') | Reverse primer (5' - 3') | Restriction enzyme |
|-----------|--------------------------|--------------------------|--------------------|
| rs9350591 | CATAAGAAAGGCATGTTGC      | CAGCTTTCATTGTATAACAAC    | <i>Msp</i> I       |
