# Supplementary material for: Functional characterisation of the osteoarthritis susceptibility locus at chromosome 6q14.1 marked by the polymorphism rs9350591
Source: Springer Nature journal article supplement (doi:10.1186/s12881-015-0215-9), 2015-09-07
Supplement: MOESM6 [file 9741360]

**Additional file 6.** Table of OA and non-OA (Lonza) MSC donor characteristics used in chondrogenesis

| <b>Patient</b> | <b>Sex</b> | <b>Age</b> | <b>Joint</b> | <b>Disease</b> |
|----------------|------------|------------|--------------|----------------|
| 1              | F          | 51         | H            | OA             |
| 2              | F          | 61         | H            | OA             |
| 3              | M          | 55         | H            | OA             |
| 4              | F          | 24         | H            | Non-OA         |
| 5              | F          | 41         | H            | Non-OA         |
| 6              | M          | 25         | H            | Non-OA         |
