# Supplementary material for: Functional characterisation of the osteoarthritis susceptibility locus at chromosome 6q14.1 marked by the polymorphism rs9350591
Source: Springer Nature journal article supplement (doi:10.1186/s12881-015-0215-9), 2015-09-07
Supplement: MOESM7 [file 9741360]

Additional file 7. Bioinformatics database search of the SNPs in high LD with rs9350591

| SNP         | Distance from rs9350591 (bp) | $r^2$ relative to rs9350591 | $D'$ relative to rs9350591 | Genotyped on  |                   | SNP location | Transcription factor binding                              | Chromatin State                   |                                        |                          |
|-------------|------------------------------|-----------------------------|----------------------------|---------------|-------------------|--------------|-----------------------------------------------------------|-----------------------------------|----------------------------------------|--------------------------|
|             |                              |                             |                            | arcOGEN array | HG19 co-ordinates |              |                                                           | Bone marrow-derived cultured MSCs | MSC-derived chondrocyte cultured cells | Osteoblast primary cells |
| rs12211255  | 53197                        | 0.810                       | 1.000                      | No            | 76188330          | Intronic     | No data                                                   | No data                           | No data                                | No data                  |
| rs10943249  | 42308                        | 1.000                       | 1.000                      | No            | 76199219          | Intronic     | No data                                                   | No data                           | No data                                | No data                  |
| rs35985089  | 39845                        | 1.000                       | 1.000                      | No            | 76201682          | Intronic     | No data                                                   | Weak transcription                | Weak repressed polycomb                | Weak repressed polycomb  |
| rs9343292   | 38871                        | 1.000                       | 1.000                      | No            | 76202656          | Intronic     | ATF2, NFKB1, POLR2A, TBP, NR3C1, USF1                     | Weak transcription                | Flanking active TSS                    | Repressed polycomb       |
| rs11964634  | 21727                        | 1.000                       | 1.000                      | No            | 76219800          | Intergenic   | No data                                                   | No data                           | No data                                | No data                  |
| rs9360913   | 17208                        | 0.935                       | 1.000                      | No            | 76224319          | Intergenic   | No data                                                   | Quiescent/low                     | Quiescent/low                          | Quiescent/low            |
| rs9359125   | 10223                        | 0.872                       | 1.000                      | No            | 76231304          | Intergenic   | No data                                                   | Quiescent/low                     | Quiescent/low                          | Quiescent/low            |
| rs12190734  | 9543                         | 0.935                       | 1.000                      | No            | 76231984          | Intergenic   | No data                                                   | No data                           | No data                                | No data                  |
| rs9343297   | 6830                         | 0.935                       | 1.000                      | No            | 76234697          | Intergenic   | EP300, TCF7L2, TRIM28, ZNF263, GATA3, REST                | Enhancer                          | Enhancer                               | Enhancer                 |
| rs9341526   | 5138                         | 0.935                       | 1.000                      | No            | 76236389          | Intergenic   | ARID3A, CTCF, CEBPB, FOXM1, JUND, SMC3, YY1, RAD21, RUNX3 | Quiescent/low                     | Quiescent/low                          | Weak repressed polycomb  |
| rs12200169  | 4406                         | 1.000                       | 1.000                      | No            | 76237121          | Intergenic   | No data                                                   | Quiescent/low                     | Quiescent/low                          | Weak repressed polycomb  |
| rs12207675  | 3786                         | 0.935                       | 1.000                      | No            | 76237741          | Intergenic   | No data                                                   | Quiescent/low                     | Quiescent/low                          | Weak repressed polycomb  |
| rs12202443  | 2913                         | 0.935                       | 1.000                      | No            | 76238614          | Intergenic   | CTCF                                                      | Quiescent/low                     | Quiescent/low                          | Weak repressed polycomb  |
| rs13192994  | 2265                         | 0.935                       | 1.000                      | No            | 76239262          | Intergenic   | No data                                                   | No data                           | No data                                | No data                  |
| rs9343299   | 1682                         | 0.935                       | 1.000                      | No            | 76239845          | Intergenic   | No data                                                   | No data                           | No data                                | No data                  |
| rs9352215   | 1646                         | 0.935                       | 1.000                      | No            | 76239881          | Intergenic   | No data                                                   | No data                           | No data                                | No data                  |
| rs9350591   | 0                            | 1.000                       | 1.000                      | Yes           | 76241527          | Intergenic   | No data                                                   | Weak repressed polycomb           | Quiescent/low                          | Weak repressed polycomb  |
| rs117337795 | 3443                         | 0.935                       | 1.000                      | No            | 76244970          | Intergenic   | No data                                                   | No data                           | No data                                | No data                  |
| rs7756065   | 5985                         | 1.000                       | 1.000                      | Yes           | 76247512          | Intergenic   | No data                                                   | Weak repressed polycomb           | Weak repressed polycomb                | Weak repressed polycomb  |
| rs9359127   | 6118                         | 1.000                       | 1.000                      | No            | 76247645          | Intergenic   | No data                                                   | Weak repressed polycomb           | Repressed polycomb                     | Weak repressed polycomb  |
| rs9359128   | 8929                         | 1.000                       | 1.000                      | No            | 76250456          | Intergenic   | No data                                                   | Weak repressed polycomb           | Weak repressed polycomb                | Weak repressed polycomb  |
| rs11963619  | 11538                        | 1.000                       | 1.000                      | No            | 76253065          | Intergenic   | No data                                                   | No data                           | No data                                | No data                  |
| rs9352217   | 17598                        | 0.810                       | 1.000                      | No            | 76259125          | Intergenic   | No data                                                   | Quiescent/low                     | Quiescent/low                          | Weak repressed polycomb  |
| rs9360921   | 24115                        | 0.810                       | 1.000                      | No            | 76265642          | Intergenic   | USF1                                                      | Quiescent/low                     | Weak repressed polycomb                | Weak repressed polycomb  |
| rs12201305  | 42095                        | 0.810                       | 1.000                      | No            | 76283622          | Intergenic   | No data                                                   | No data                           | No data                                | No data                  |
| rs12213476  | 49846                        | 0.810                       | 1.000                      | No            | 76291373          | Intergenic   | No data                                                   | Quiescent/low                     | Quiescent/low                          | Quiescent/low            |
| rs9360926   | 58467                        | 0.810                       | 1.000                      | No            | 76299994          | Intergenic   | No data                                                   | No data                           | No data                                | No data                  |
| rs9359133   | 84148                        | 0.810                       | 1.000                      | No            | 76325675          | Intronic     | No data                                                   | Quiescent/low                     | Quiescent/low                          | Quiescent/low            |
| rs67016585  | 88824                        | 0.810                       | 1.000                      | No            | 76330351          | Intronic     | GATA1                                                     | Flanking active TSS               | Enhancer                               | Enhancer                 |
| rs33997653  | 91407                        | 0.810                       | 1.000                      | No            | 76332934          | Intronic     | No data                                                   | No data                           | No data                                | No data                  |
| rs12214738  | 102256                       | 0.810                       | 1.000                      | No            | 76343783          | Intronic     | No data                                                   | Strong transcription              | Strong transcription                   | Strong transcription     |
| rs9360930   | 139150                       | 0.810                       | 1.000                      | No            | 76380677          | Intronic     | No data                                                   | Strong transcription              | Strong transcription                   | Strong transcription     |
| rs9350596   | 139519                       | 0.810                       | 1.000                      | No            | 76381046          | Intronic     | No data                                                   | No data                           | No data                                | No data                  |
| rs9341531   | 140538                       | 0.810                       | 1.000                      | No            | 76382065          | Intronic     | No data                                                   | Strong transcription              | Strong transcription                   | Weak transcription       |
| rs9360932   | 146410                       | 0.810                       | 1.000                      | No            | 76387937          | Intronic     | No data                                                   | No data                           | No data                                | No data                  |
| rs12192223  | 156682                       | 0.810                       | 1.000                      | No            | 76398209          | Intronic     | No data                                                   | No data                           | No data                                | No data                  |
| rs9343320   | 174156                       | 0.810                       | 1.000                      | No            | 76415683          | Intronic     | No data                                                   | Weak transcription                | Strong transcription                   | Weak transcription       |
| rs12208368  | 176259                       | 0.810                       | 1.000                      | No            | 76417786          | Intronic     | No data                                                   | Strong transcription              | Strong transcription                   | Weak transcription       |
| rs12212171  | 178209                       | 0.810                       | 1.000                      | No            | 76419736          | Intronic     | No data                                                   | Strong transcription              | Enhancer                               | Weak transcription       |
| rs17792773  | 186968                       | 0.810                       | 1.000                      | No            | 76428495          | Intergenic   | No data                                                   | Strong transcription              | Strong transcription                   | Quiescent/low            |
