# Supplementary material for: Functional characterisation of the osteoarthritis susceptibility locus at chromosome 6q14.1 marked by the polymorphism rs9350591
Source: Springer Nature journal article supplement (doi:10.1186/s12881-015-0215-9), 2015-09-07
Supplement: MOESM11 [file 9741360]

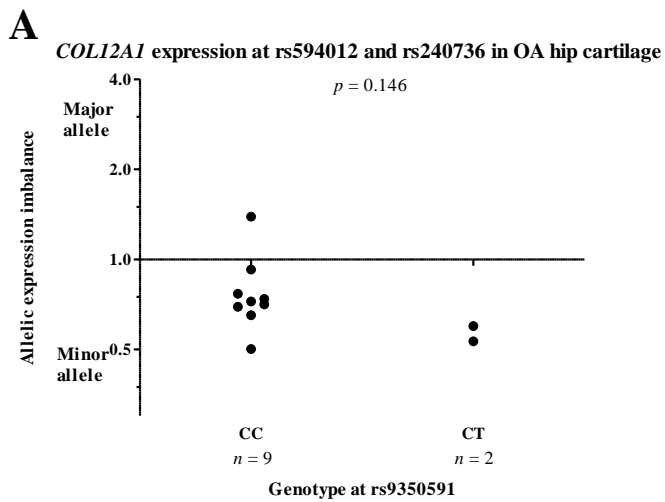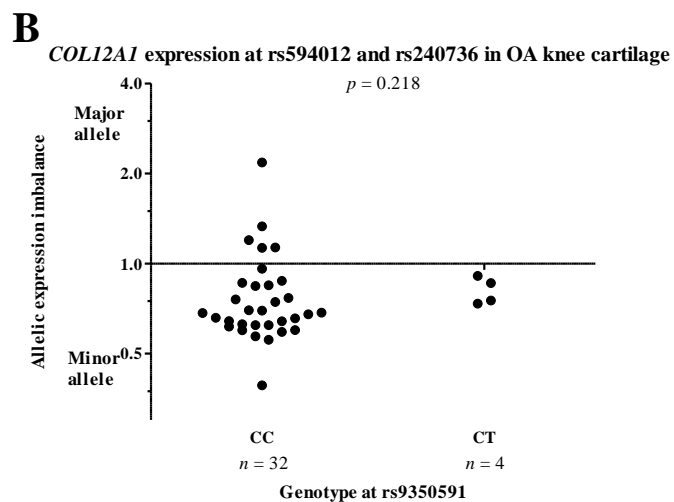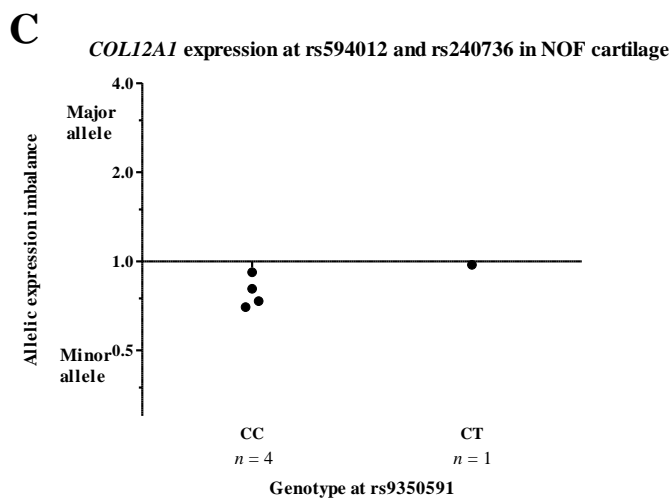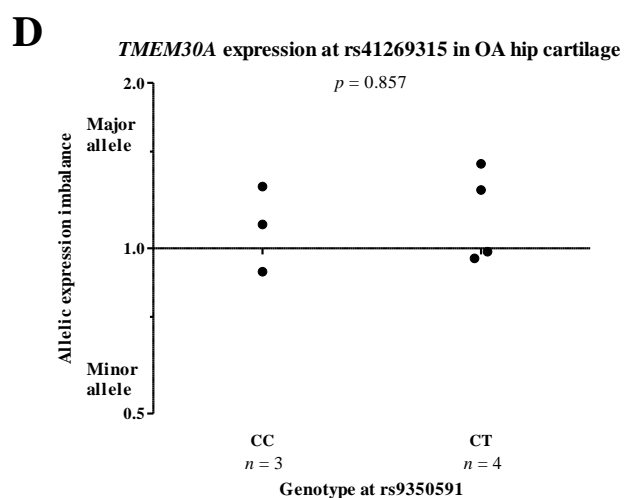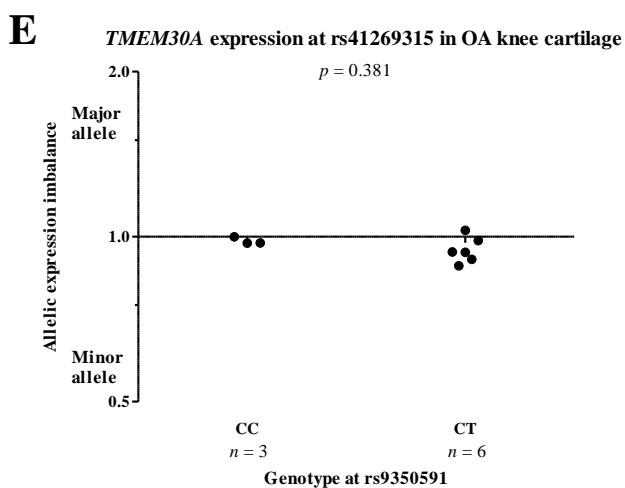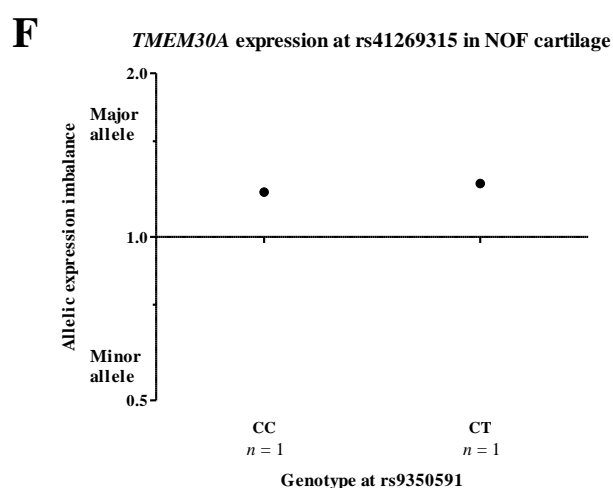

**G***MYO6* expression at rs1045758 and rs699186 in OA hip cartilage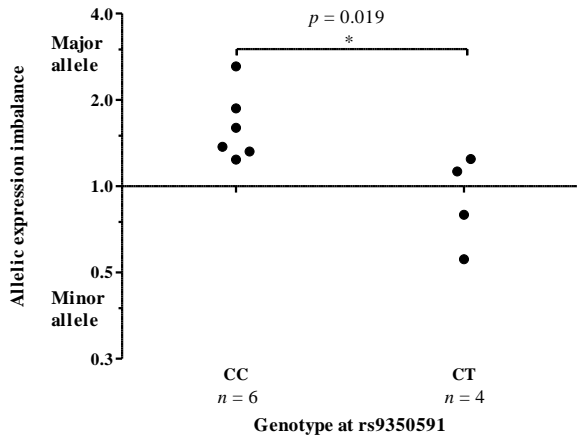**H***MYO6* expression at rs1045758 and rs699186 in OA knee cartilage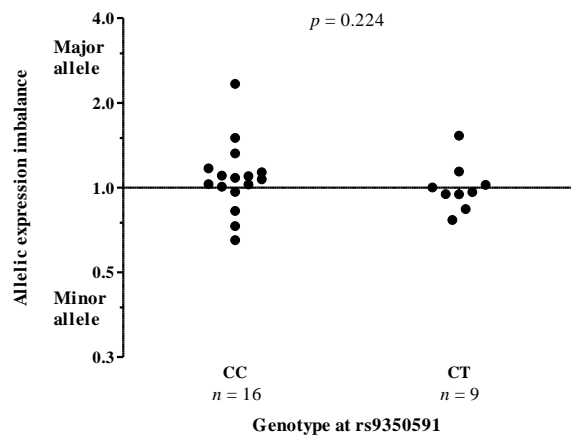**I***MYO6* expression at rs1045758 and rs699186 in NOF cartilage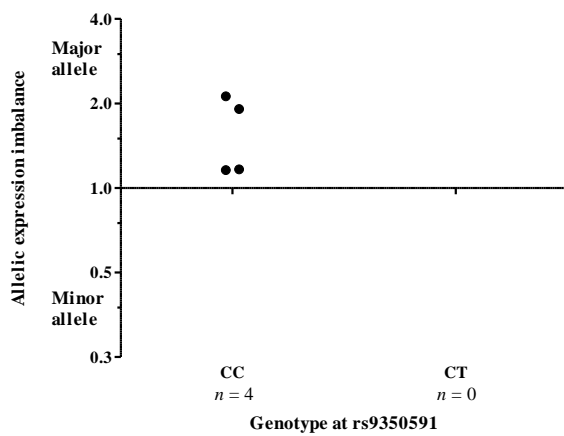**J***SENP6* expression at rs71561434 and rs17414687 in OA hip cartilage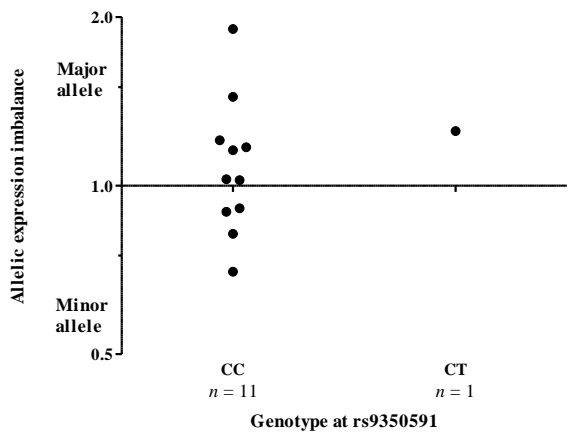**K***SENP6* expression at rs71561434 and rs17414687 in OA knee cartilage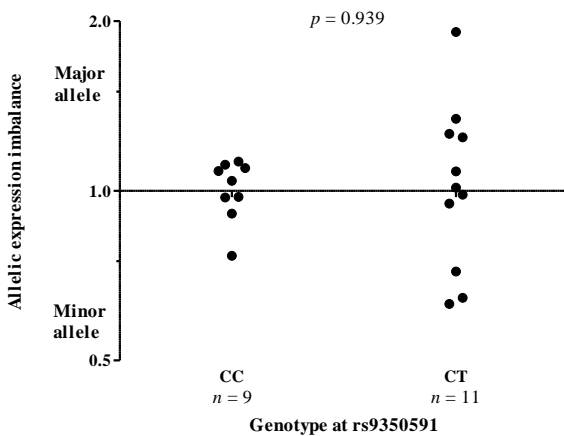**L***SENP6* expression at rs71561434 and rs17414687 in NOF cartilage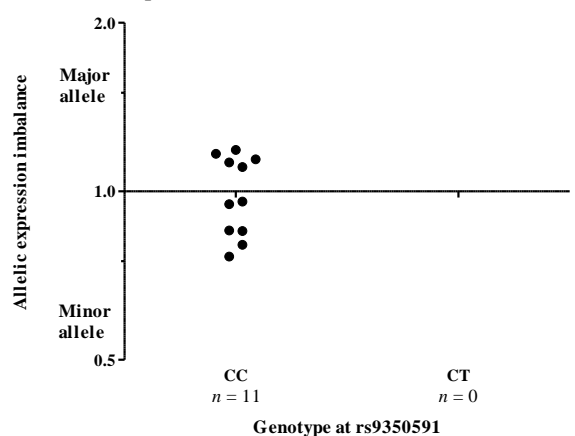

**Additional file 11. Allelic expression imbalance analysis stratified by disease state and joint site.** The data were stratified by OA hip, OA knee and NOF for *COL12A1* (A, B and C), *TMEM30A* (D, E and F), *MYO6* (G, H and I), and *SENP6* (J, K and L). Stratification did not result in any changes to the analysis of combined data. Statistical significance was assessed using the Mann-Whitney *U* test and is not corrected for multiple testing.
